# Supplementary material for: Identification and characterization of GmMYB118 responses to drought and salt stress
Source: PubMed Central journal article supplement (PMC6276260; doi:10.1186/s12870-018-1551-7), 2018-12-03
Supplement: 12870_2018_1551_MOESM1_ESM.pdf [file 12870_2018_1551_MOESM1_ESM.pdf]

# Supplementary figures and tables

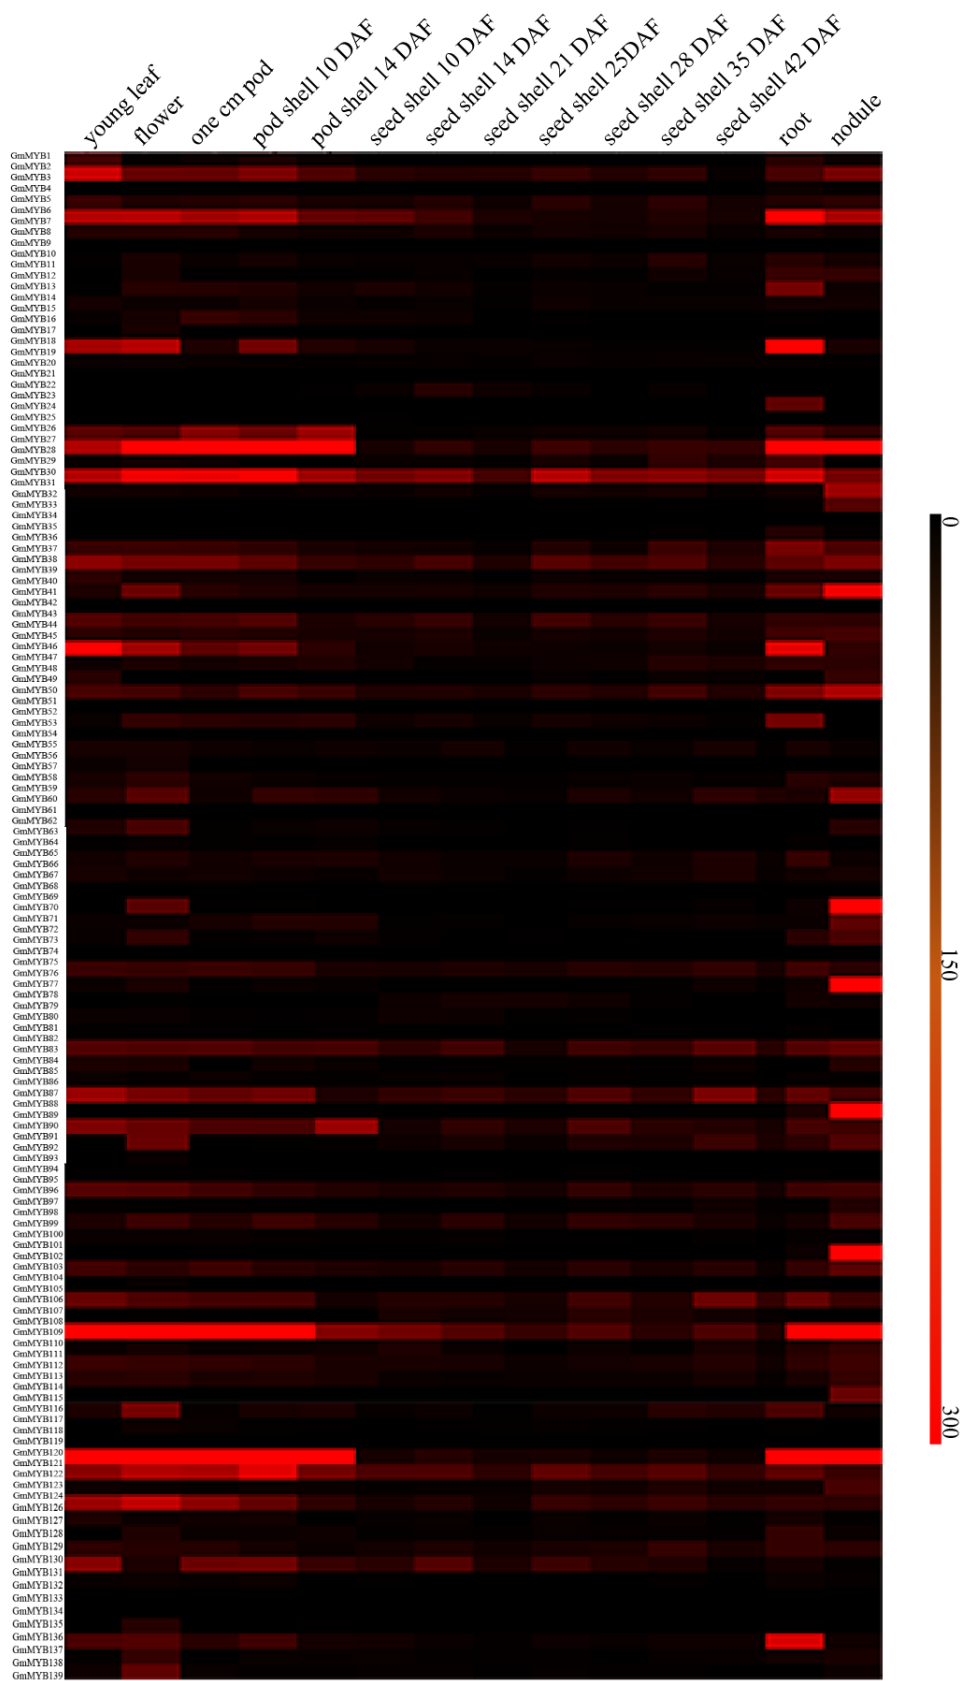

Figure S1

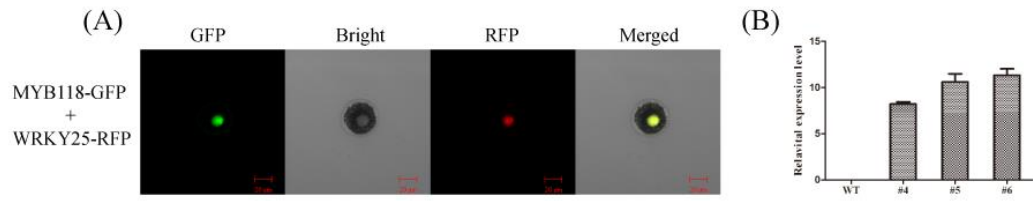

Figure S2

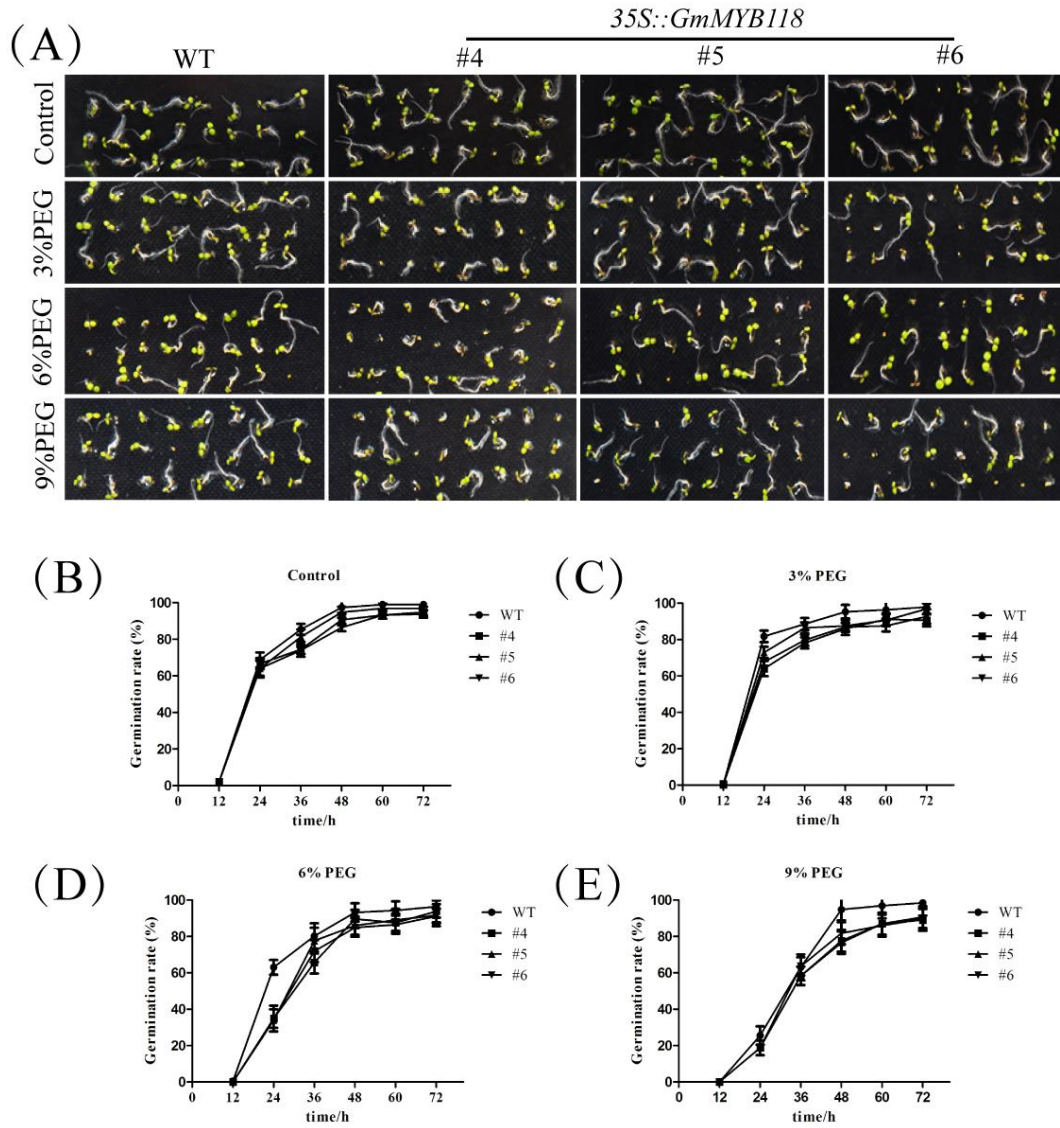

Figure S3

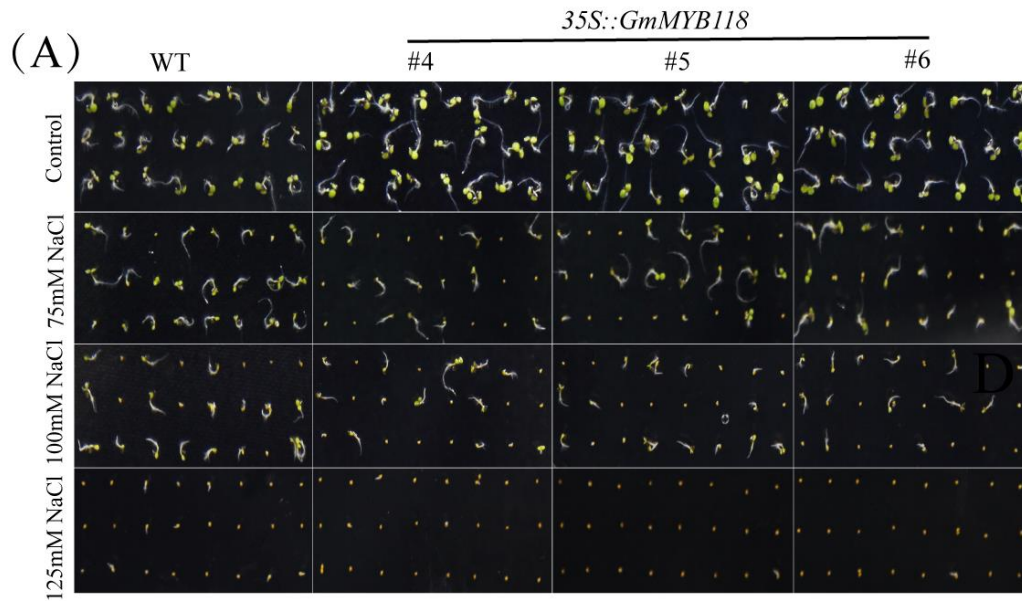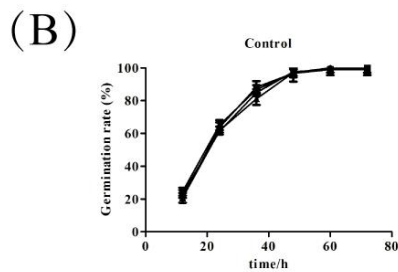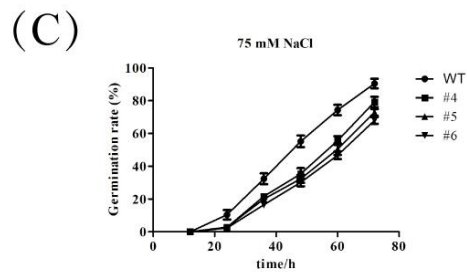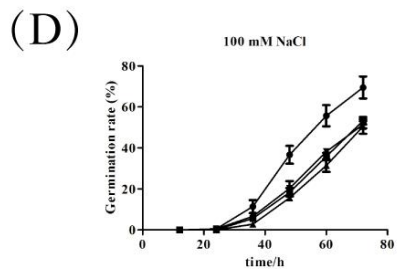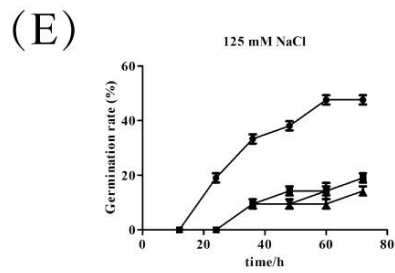

Figure S4

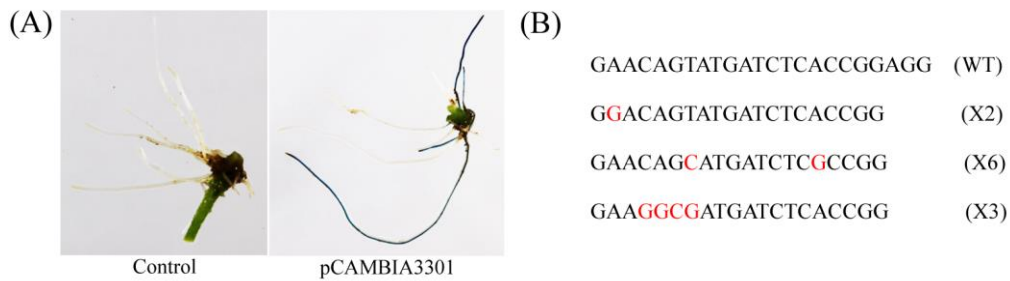

Figure S5

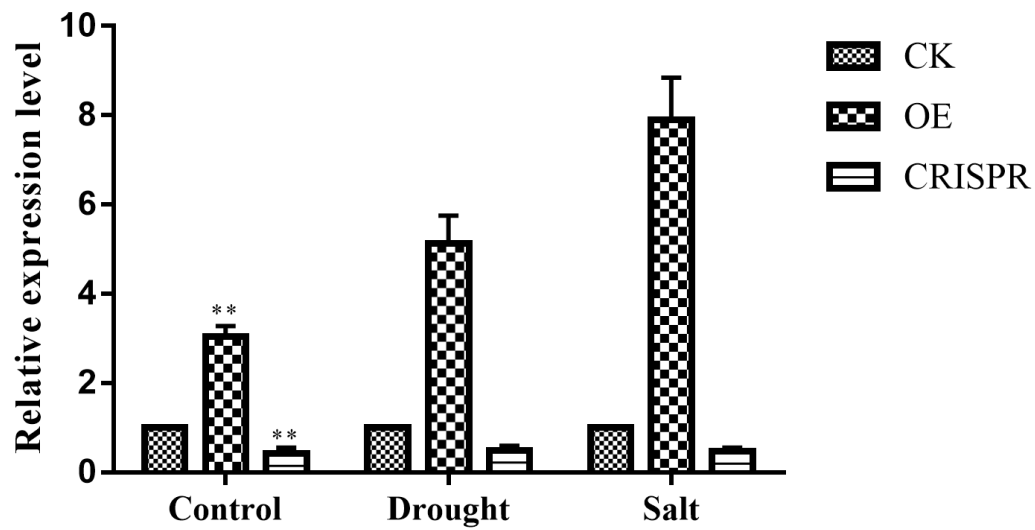

Figure S6

|              | Forward Primer        | Reverse Primer        |
|--------------|-----------------------|-----------------------|
| RT-AtNCED3   | ATTGCTTCTGCTTCCATCTCT | TTCTGTTGACCATCCCTGCT  |
| RT-AtRAB18   | AGCTCGGAGGATGATGGACA  | AGCCACCAGCATCATATCCG  |
| RT-AtDREB2A  | GGTTGGCCCAATGATGTGGA  | CCATCCTTCCCTCGAGCTG   |
| RT-AtCOR47   | AGGATTCACCAGCTGTCAAG  | AGGATTCACCAGCTGTCAAG  |
| RT-AtKIN1    | TAAACACCTCCCCTGCCC    | TTGTTGAGCCGGTCTTGTG   |
| RT-AtKIN2    | CAAGAATGCCTTCCAAGCC   | TAAACACCTCCCCTGCCC    |
| RT-AtCOR15   | GCGATGTCTTTCTCAGGAGC  | CGAACTGAGTTTTCTGCCC   |
| RT-AtADH1    | CTCCACCGCAGAAACACGA   | TCCAACACTCTCAACAATCCC |
| RT-AtActin   | AAGTCTTGTTCCAGCCCTCG  | AAGTCTTGTTCCAGCCCTCG  |
| RT-GmActin   | ACATTGTTCTTAGTGGTGGCT | CTGTTGGAAGGTGCTGAG    |
| RT- GmMYB7   | AGAACAAGTCCGCAAGA     | AACGGCAAAGGCTCAATG    |
| RT- AtMYB20  | AACATTACATAGCGAAGC    | ACCGAAGGTATAAACTCC    |
| RT- AtMYB31  | CGACGAAGCAACCTCAAT    | AAGAACCAACCCCAAAT     |
| RT- AtMYB49  | AGCCAATAGGAGGGGTTA    | TGTTGTGTGAAGGGAGGA    |
| RT- AtMYB75  | CAACAAGAAATCCGAAGG    | GGAGGTAATTAACCCACC    |
| RT- AtMYB81  | TTGGTGTATTTTGTGGC     | GTGTTGTCTTGGGGTGT     |
| RT- AtMYB92  | GAGGTGATAATGGTGTGA    | ACTGGCTGAAGAGTAGTG    |
| RT- AtMYB105 | TTGGTGTTCCTTTGTGGC    | TCCTCGCTTTTGTCCCTG    |
| RT- AtMYB110 | AGCCAATAGGAGGGGTTA    | TGTGTTGTGTGAAGGGAG    |
| RT- AtMYB118 | ATCATACTGTTCCGAGTCAG  | CAGACACTGTAGAGACCTGTT |

Table S1

|             | Forward Primer                       | Reverse Primer                             |
|-------------|--------------------------------------|--------------------------------------------|
| MYB118-1302 | GGGACTCTTGACCATGATGTCTCG<br>CGCCTCCT | TCAGATCTACCATGGCAGCAACACTAA<br>TGATGCTTTCT |
| MYB118-3301 | GGACTCTTGACCATGATGTCTCG<br>GCCTCCT   | ATTCGAGCTGGTCACCAGCAACACTAA<br>TGATGCTTTCT |
| MYB118-GFP  | TATCTCTAGAGGATCCATGTCTCG<br>CGCCTCCT | TGCTCACCATGGATCCAGCAACACTAA<br>TGATGCTTTCT |
| WRKY25-RFP  | CCCAGATCACTAGTATGTCTTCCA<br>CTTCT    | CTTGCTCACCATGGATCCTCACGAGCG<br>TAGC        |
| sgRNA seeds | ATTGGAACAGTATGATCTCACCGG             | AAACCCGGTGAGATCATACTGTTC                   |
| U6-sgRNA    | GCAGTATGCAGAGCAGAGTCA                | CCGGTGAGATCATACTGTTC                       |
| pCas9       | TGTA AAAACGACGGCCAGT                 | CAGGAAACAGCTATGACC                         |

Table S2
